# Supplementary material
Source: MDPI journal article supplement (https://www.mdpi.com/2313-0105/8/9/108)
Supplement: s1 [file s1]

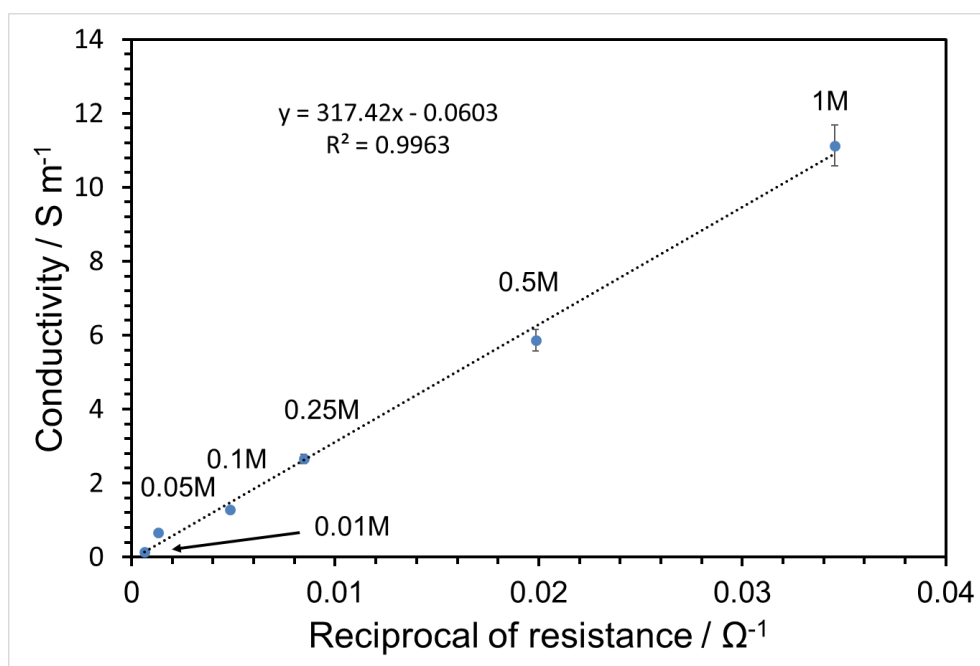

Figure S1. Aqueous KCl solution conductivity as function of reciprocal of resistance.

Table S1. Resistance and conductivity of 1 mol  $\text{dm}^{-3}$   $\text{NaClO}_4$  in 1:1 EC/DEC electrolyte at various temperatures

| Temperature ( $^{\circ}\text{C}$ ) | Resistance ( $\Omega$ ) | Conductivity ( $\text{S m}^{-1}$ ) |
|------------------------------------|-------------------------|------------------------------------|
| 10                                 | 561                     | 0.566                              |
| 15                                 | 501                     | 0.633                              |
| 20                                 | 468                     | 0.678                              |
| 25                                 | 396                     | 0.802                              |
| 40                                 | 370                     | 0.857                              |
| 50                                 | 318                     | 0.999                              |
| 60                                 | 271                     | 1.17                               |
| 70                                 | 236                     | 1.34                               |
| 80                                 | 220                     | 1.44                               |

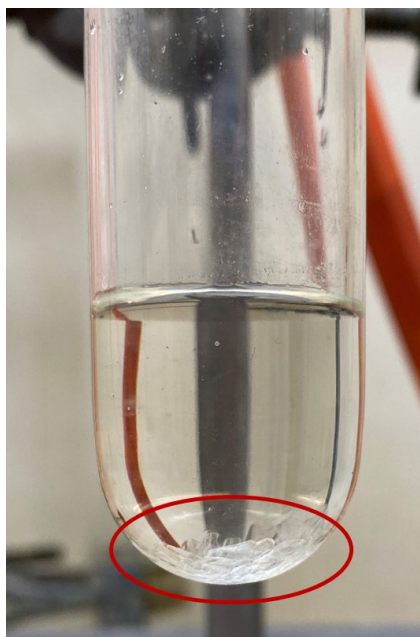

Figure S2. Photograph of 1 mol dm<sup>-3</sup> NaClO<sub>4</sub> in 1:1 EC/DEC after standing overnight around 20 °C.

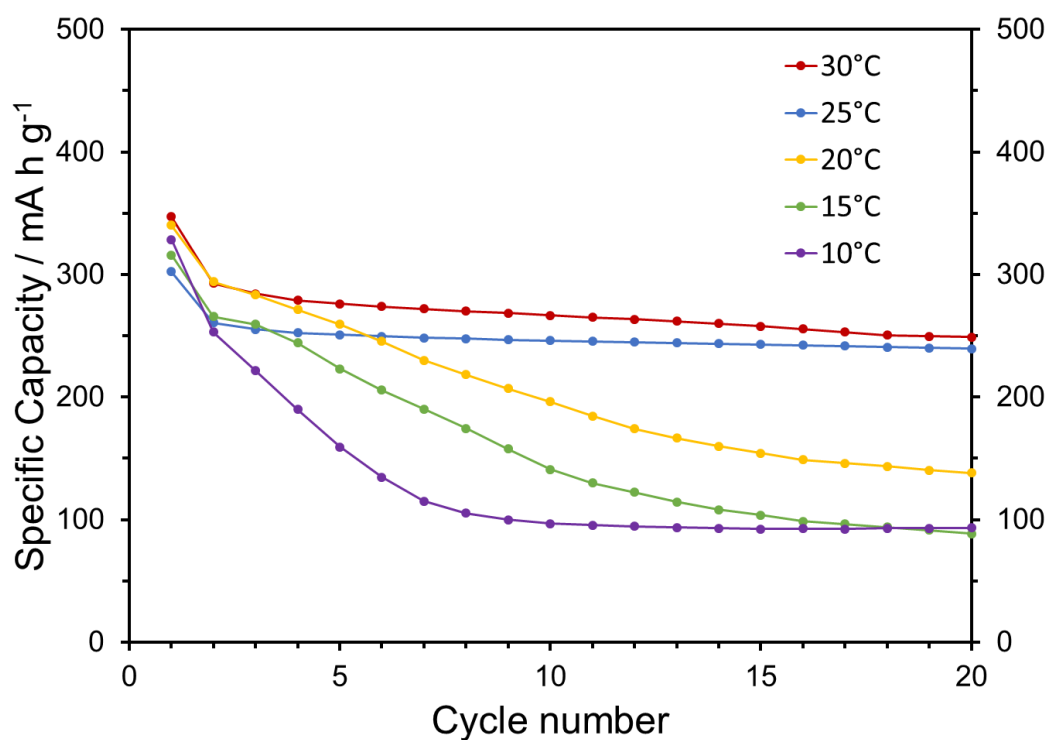

Figure S3. Reduction specific capacity of HC at temperatures from 10 to 30 °C between 0.001 and 2 V (vs. Na<sup>+</sup>/Na) at 100 mA g<sup>-1</sup> in sodium half-cells.

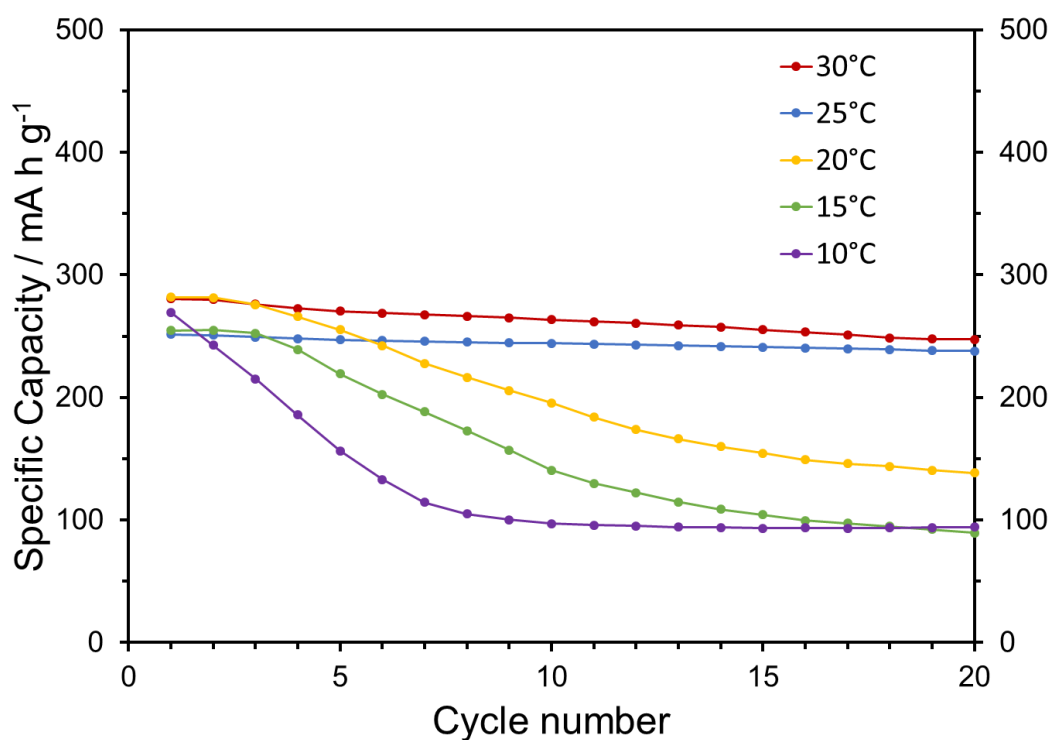

Figure S4. Oxidation specific capacity of HC at temperatures from 10 to 30 °C between 0.001 and 2 V (vs. Na<sup>+</sup>/Na) at 100 mA g<sup>-1</sup> in sodium half-cells.

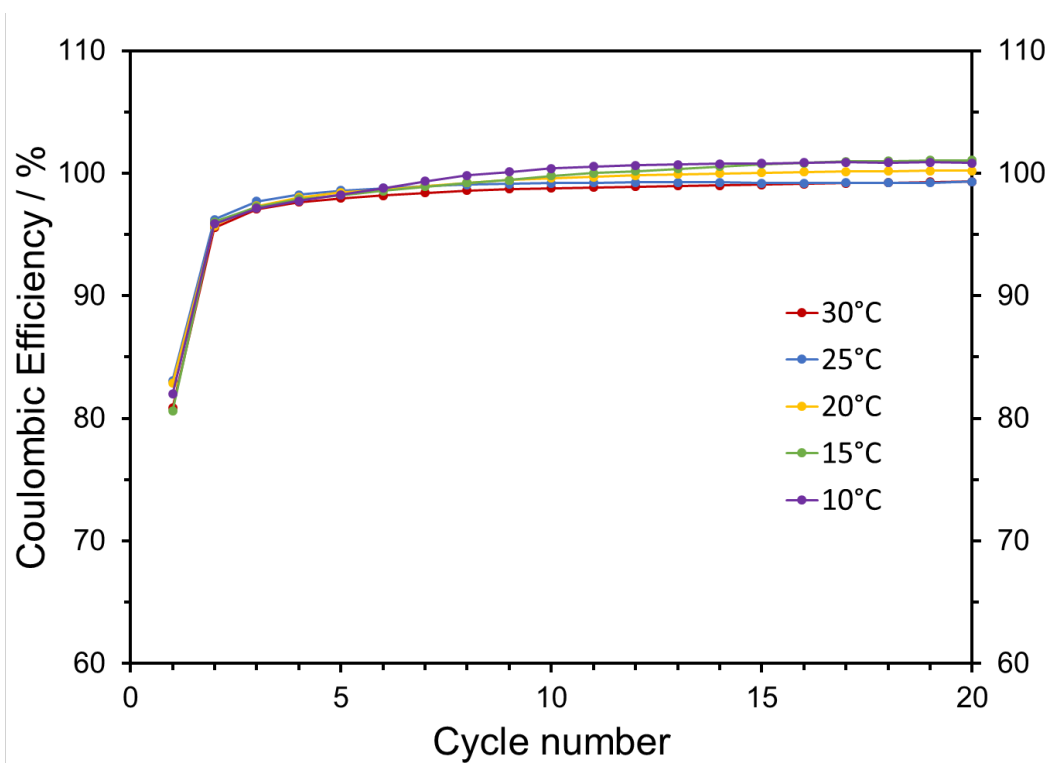

Figure S5. Coulombic efficiency of HC at temperatures from 10 to 30 °C cycled between 0.001 and 2 V (vs. Na<sup>+</sup>/Na) at 100 mA g<sup>-1</sup> in sodium half-cells.

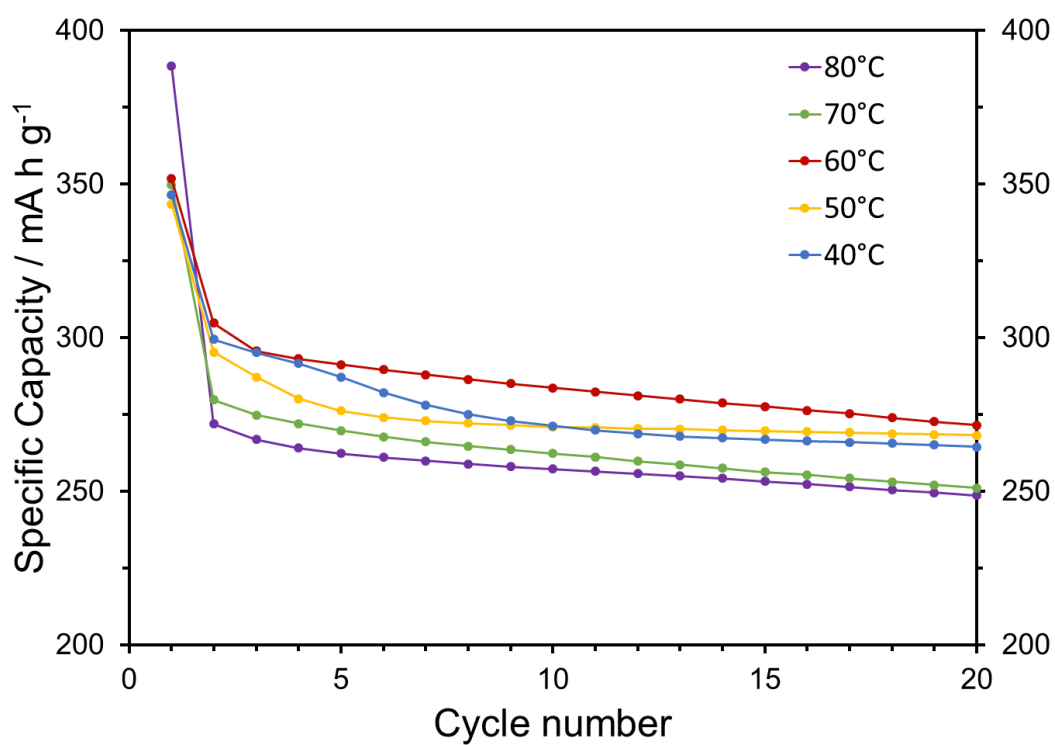

Figure S6. Reduction specific capacity of HC at temperatures from 40 to 80 °C between 0.001 and 2 V (vs. Na<sup>+</sup>/Na) at 100 mA g<sup>-1</sup> in sodium half-cells.

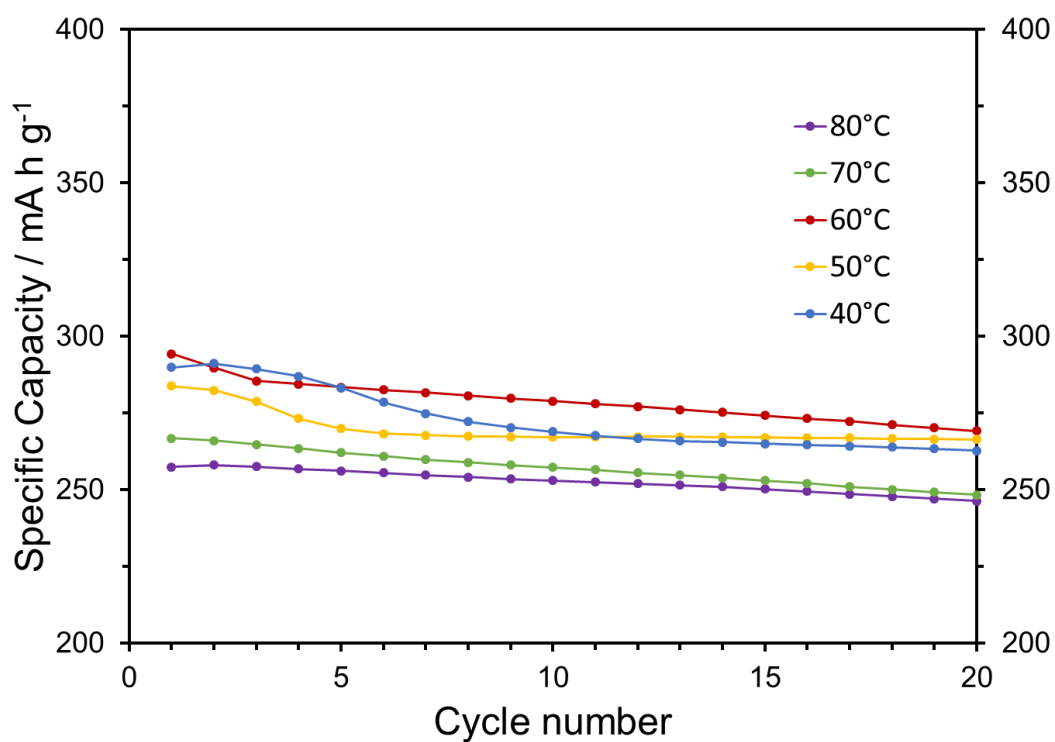

Figure S7. Oxidation specific capacity of HC at temperatures from 40 to 80 °C between 0.001 and 2 V (vs. Na<sup>+</sup>/Na) at 100 mA g<sup>-1</sup> in sodium half-cells.

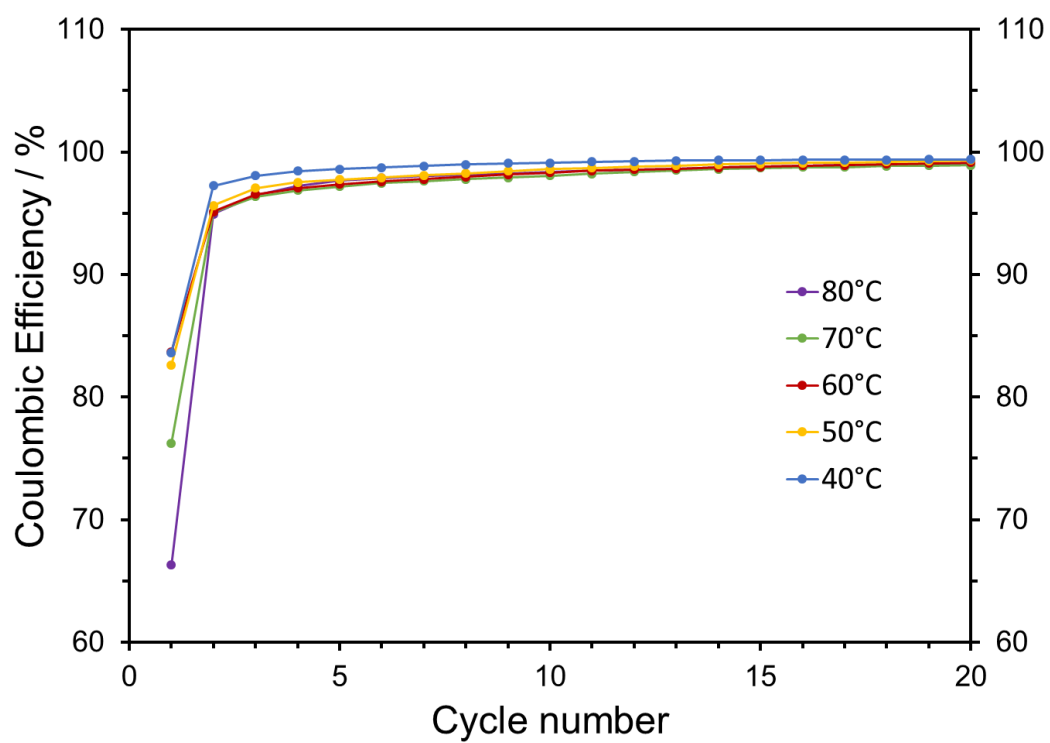

Figure S8. Coulombic efficiency of HC at temperatures from 40 to 80 °C cycled between 0.001 and 2 V (vs.  $\text{Na}^+/\text{Na}$ ) at  $100 \text{ mA g}^{-1}$  in sodium half-cells.

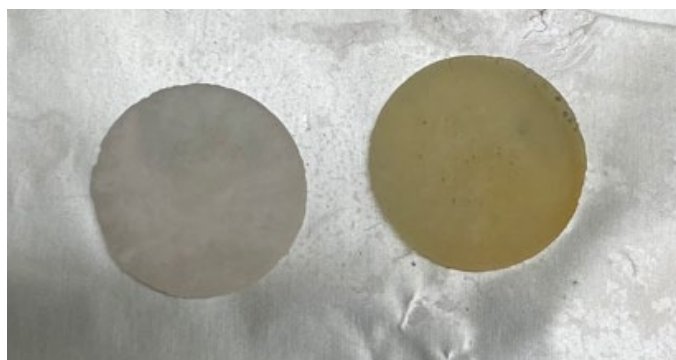

Figure S9. Separators (12 mm discs) after 20 cycles at 25 °C (left) and 60 °C (right).

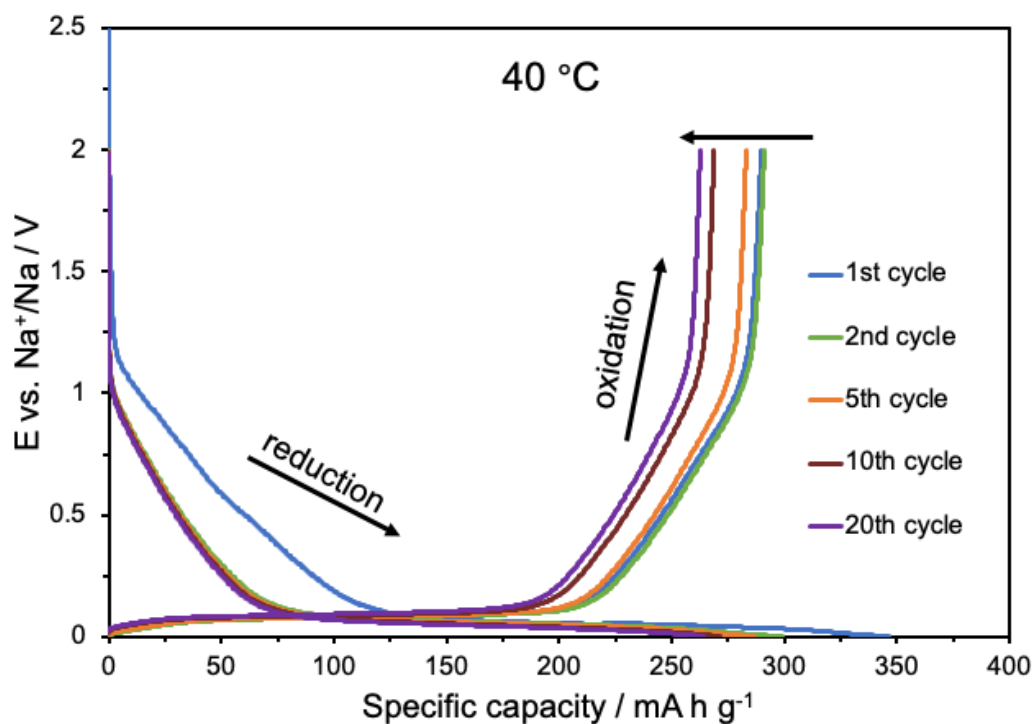

Figure S10. Voltage-capacity plots of galvanostatic cycling data at  $100 \text{ mA g}^{-1}$  current for HC at the 1<sup>st</sup>, 2<sup>nd</sup>, 5<sup>th</sup>, 10<sup>th</sup> and 20<sup>th</sup> cycle at  $40^\circ\text{C}$ .

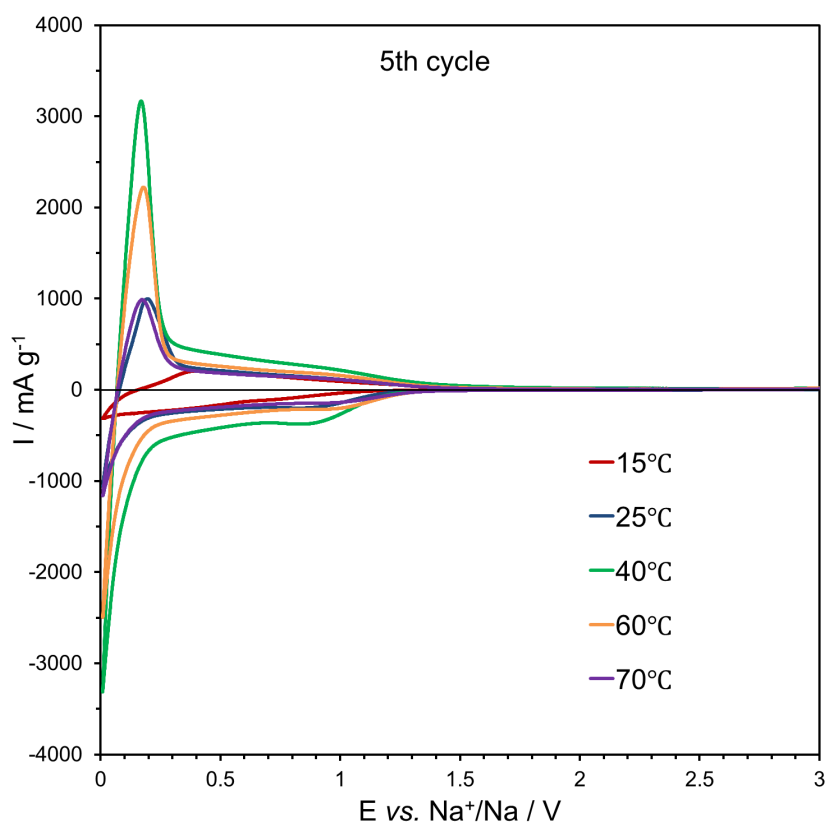

Figure S11. CV profile of the 5<sup>th</sup> cycle of HC at temperatures from 15 to  $70^\circ\text{C}$  at  $1 \text{ mV s}^{-1}$  scan rate between 3 and 0.01 V vs.  $\text{Na}^+/\text{Na}$ .

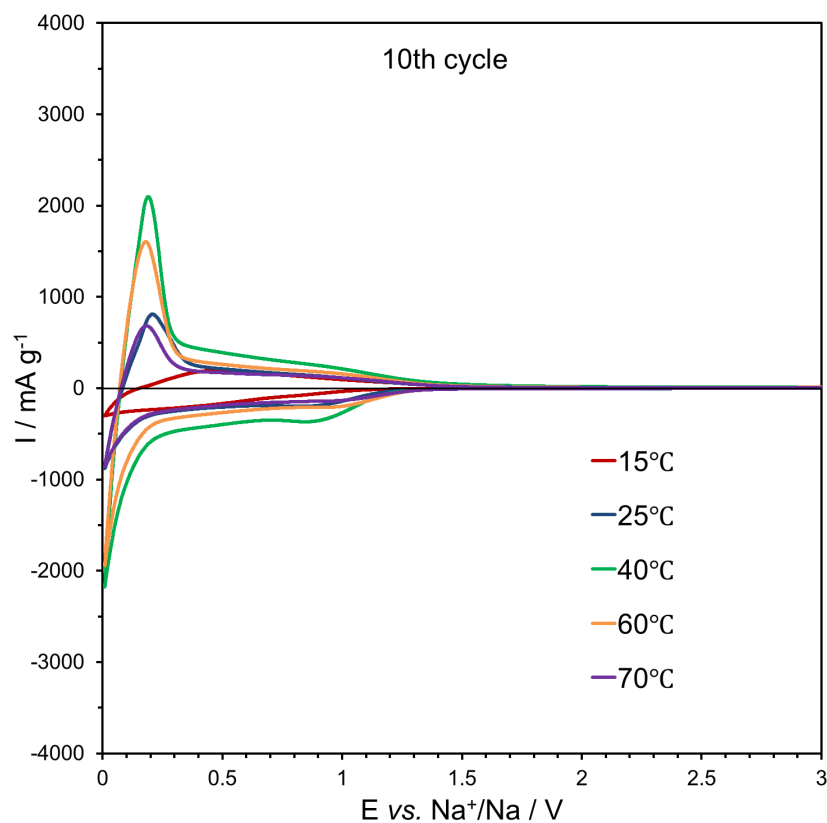

Figure S12. CV profile of the 10<sup>th</sup> cycle of HC at temperatures from 15 to 70 °C at 1 mV s<sup>-1</sup> scan rate between 3 and 0.01 V vs. Na<sup>+</sup>/Na.

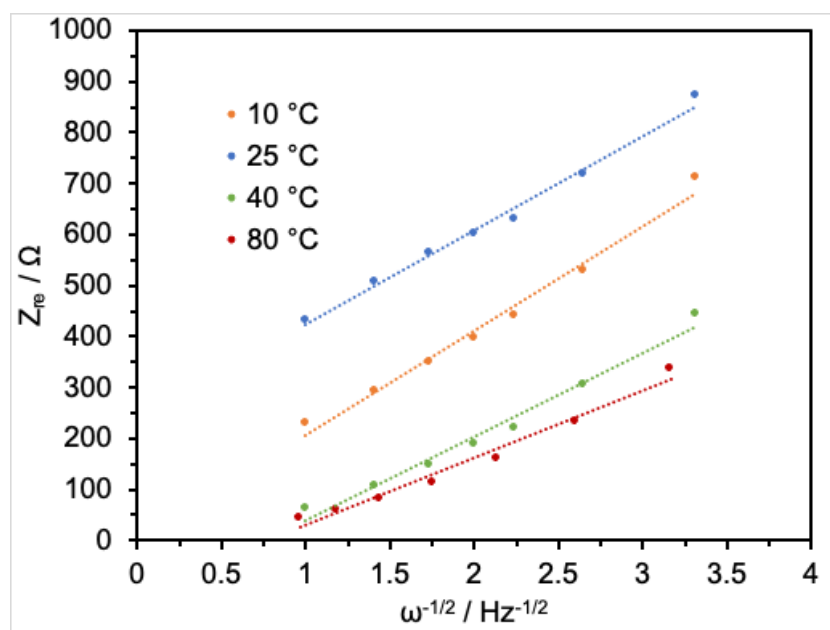

Figure S13. The relationship between  $Z_{re}$  and  $\omega^{-1/2}$  at low frequency with freshly prepared cells at 10, 25, 40 and 80 °C

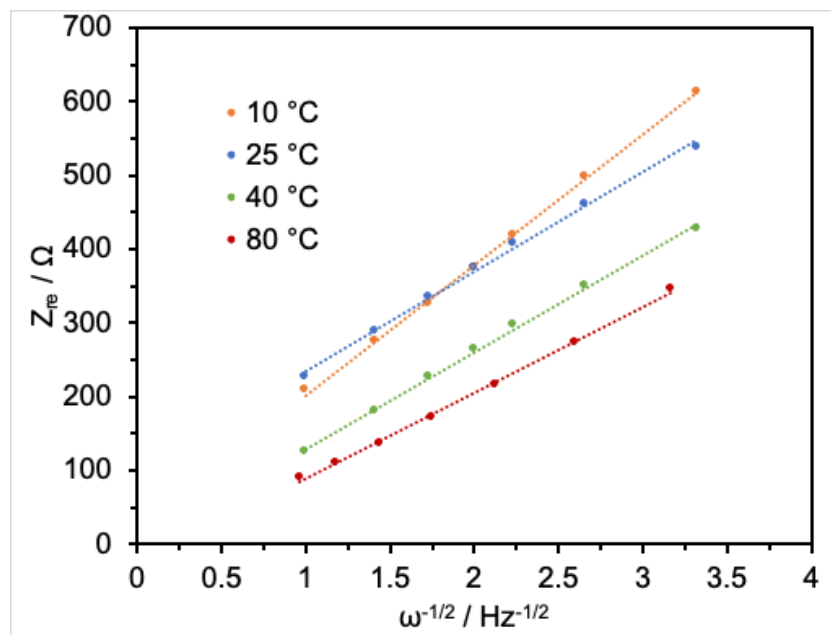

Figure S14. The relationship between  $Z_{re}$  and  $\omega^{-1/2}$  at low frequency with cycled 19 times cells at 10, 25, 40 and 80 °C.

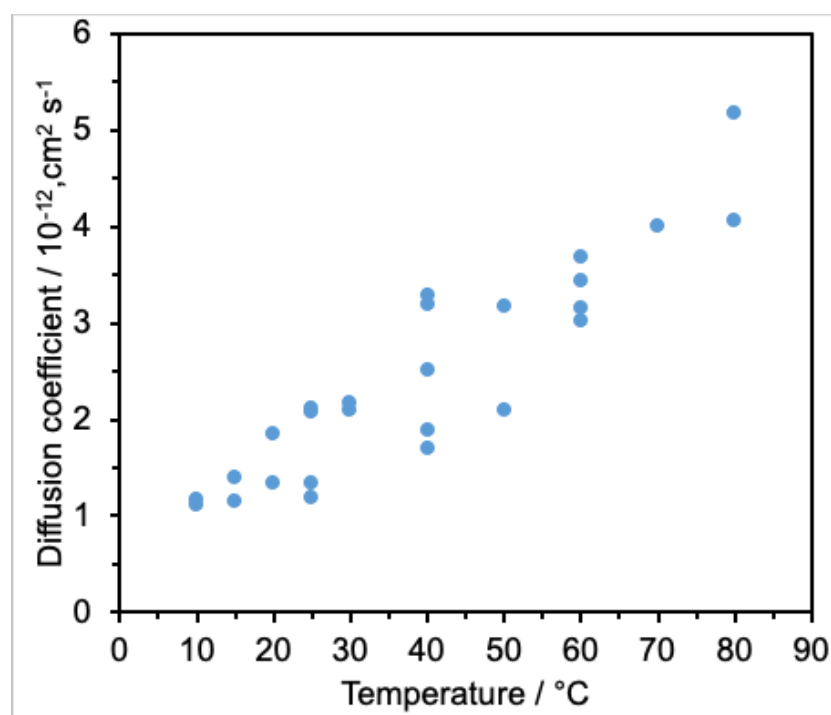

Figure S15. Na ion diffusion coefficients after 19 cycles at temperatures from 10 to 80 °C.



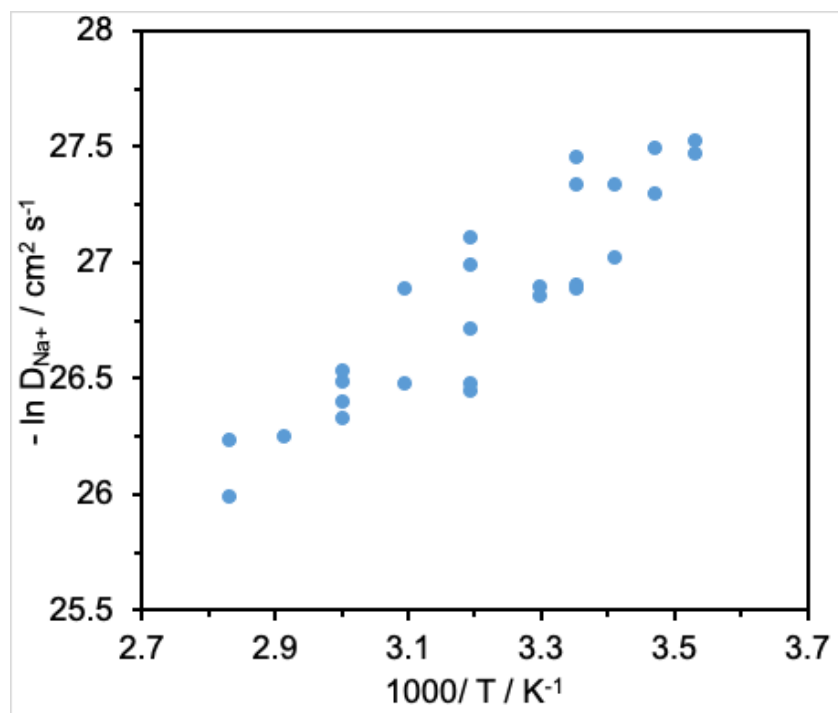

Figure S16. Dependence of the natural logarithm of the Na<sup>+</sup> diffusion coefficient on reciprocal temperature.

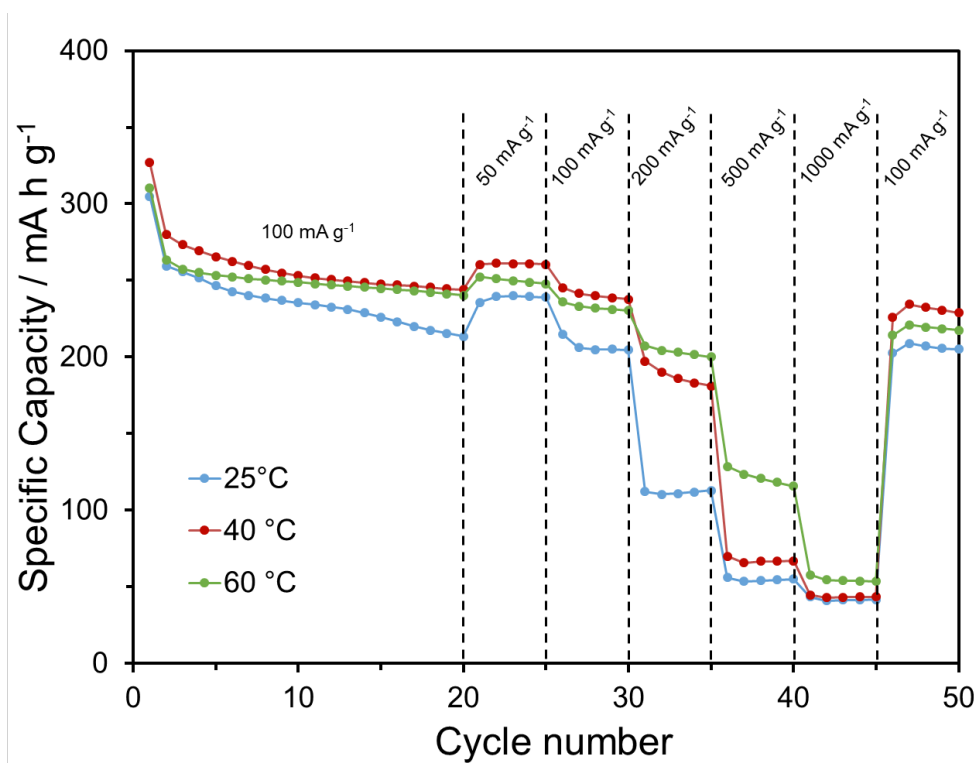

Figure S17. Rate capability of HC reduction capacity at different current densities and at temperatures of 25, 40 and 60 °C.

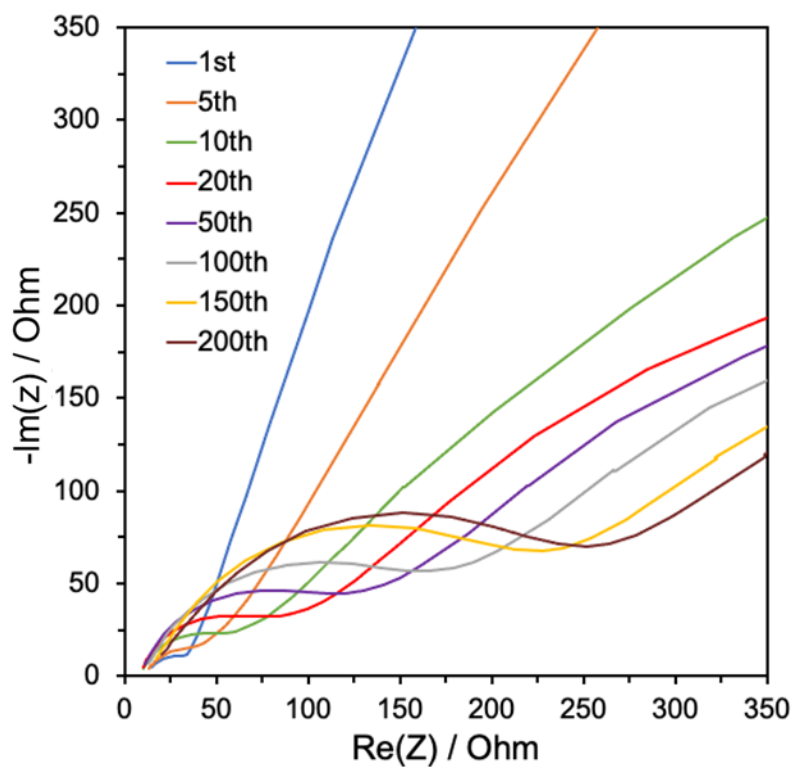

Figure S18. Nyquist plots of HC electrode after different numbers of cycles at 25 °C long-term cycling.

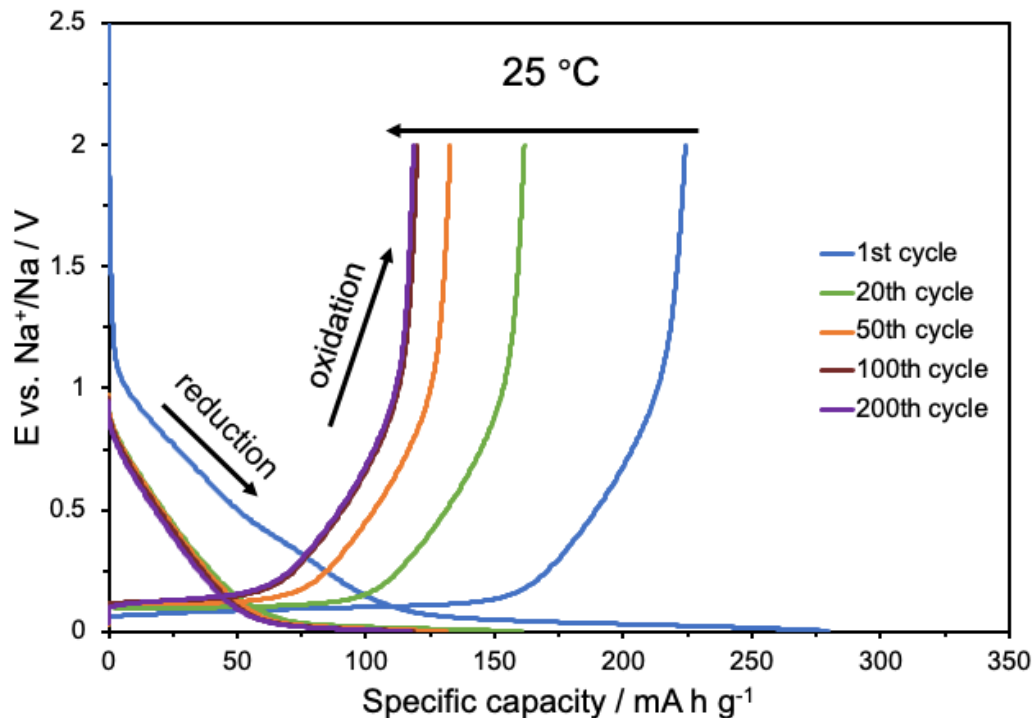

Figure S19. Voltage-capacity plots of galvanostatic cycling data at 100 mA g<sup>-1</sup> current for HC at the 1<sup>st</sup>, 20<sup>th</sup>, 50<sup>th</sup>, 100<sup>th</sup> and 200<sup>th</sup> cycle at 25 °C.

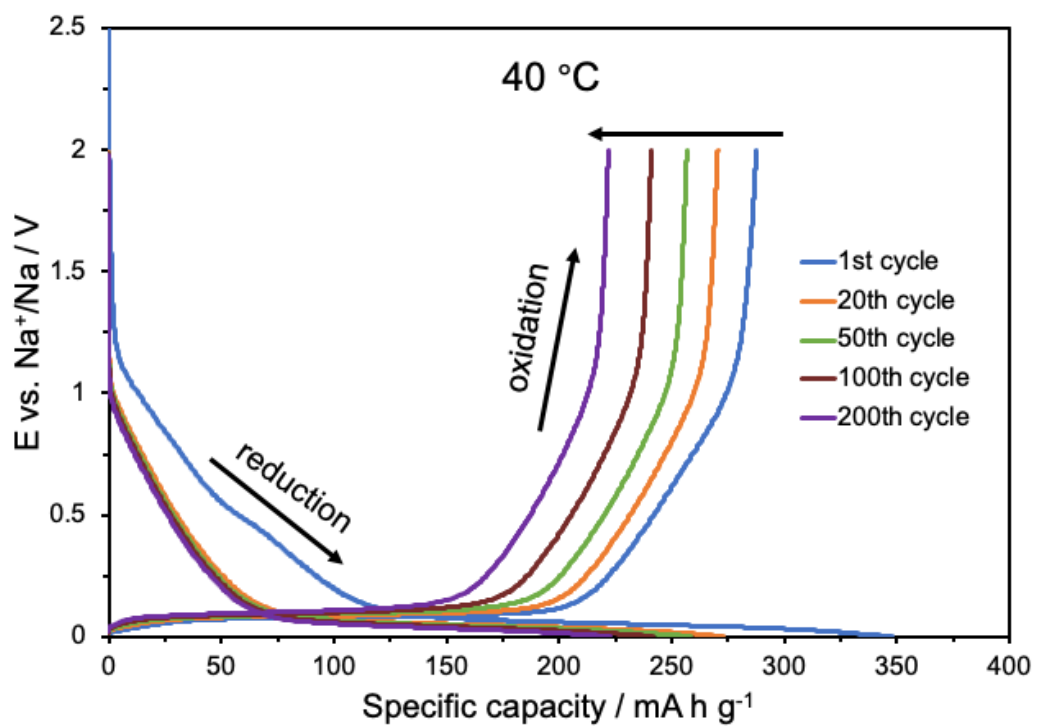

Figure S20. Voltage-capacity plots of galvanostatic cycling data at 100 mA g<sup>-1</sup> current for HC at the 1<sup>st</sup>, 20<sup>th</sup>, 50<sup>th</sup>, 100<sup>th</sup> and 200<sup>th</sup> cycle at 40 °C.
